# Supplementary material for: Human Hematopoietic Stem Cells Can Survive In Vitro for Several Months
Source: Hindawi journal article supplement (doi:10.1155/2009/936761), 2009-01-01
Supplement: f1 [file 936761.f1.pdf]

**Supplementary Figure S1**

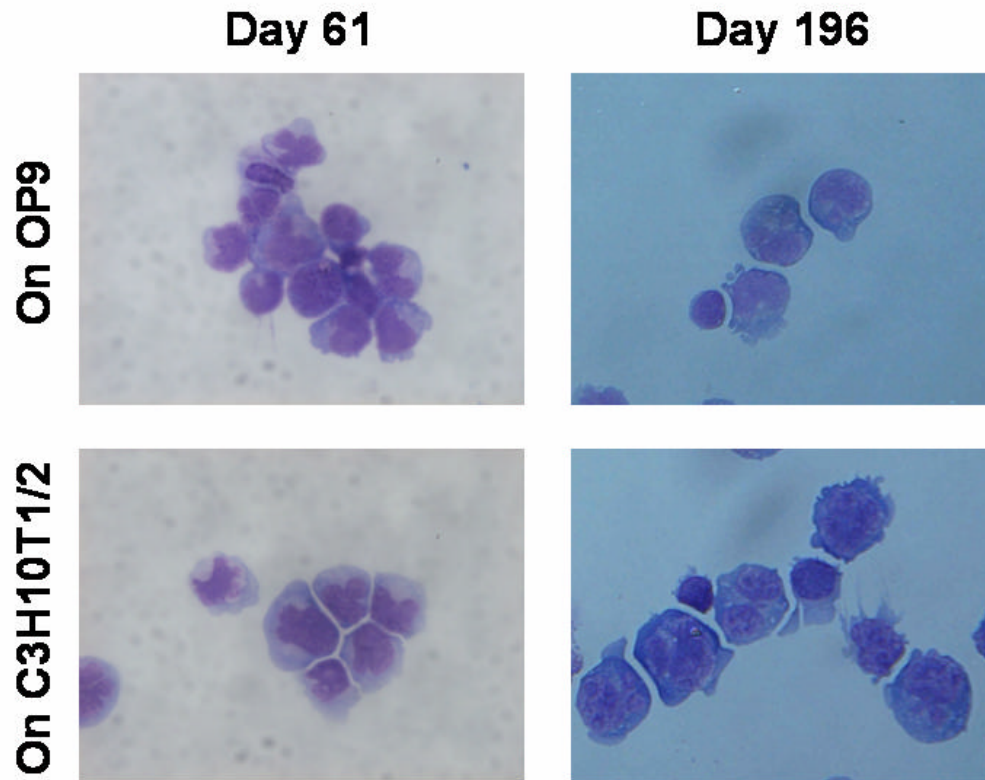

**Supplementary Figure S1. Morphology of detached cells. The images show detached cells from cultures on OP9 (Exp-OP9-A) or C3H10T1/2 (Exp-10T1/2-A) feeder cells collected on days 61 and 196 of culture. The cells are Wright stained. The morphology of detached cells from other experiments was similar to those shown here.**
